# Supplementary material for: Mitochondrial mutations and metabolic adaptation in pancreatic cancer
Source: PubMed Central journal article supplement (PMC5282905; doi:10.1186/s40170-017-0164-1), 2017-01-30
Supplement: 40170_2017_164_MOESM1_ESM.pdf [file 40170_2017_164_MOESM1_ESM.pdf]

## Supplementary data

### **Supplementary Figure 1:**

Sanger sequencing traces from matched normal, primary tumour and PDCL for TKCC-10, showing the presence of a somatic heteroplasmic insertion in primary tumour, which progresses to homoplasmy in the PDCL.

**Supplementary Table 1:** Nuclear mitochondrial and metabolic genes analysed for somatic mutations.

**Supplementary Table 2:** Detailed description of function in nuclear mitochondrial and metabolic genes with non-synonymous mutations in PDCLs.

**Supplementary Table 3:** Intracellular metabolites (n=72) targeted in metabolomics analysis.

## Supplementary Methods

### **1. Culture Medium for TKCC-02, 03, 04.**

|                                       |            |
|---------------------------------------|------------|
| RPMI 1640 (Gibco®)                    | 500 ml     |
| Fetal Bovine Serum (FBS) (HyClone)    | 10%        |
| hEGF (Invitrogen) (1 mg/ml)           | 20 ng/ml   |
| Penicillin Streptomycin (Gibco®)      | 5 ml       |
| (+5,000 U/ml Pen, +5,000 mg/ml Strep) |            |
| Gentamicin (Pfizer) (40 mg/ml)        | 0.02 mg/ml |

### **2. Culture Medium for TKCC-07, 08, 09, 10, 15-LO, 16-LO, 17-LO, 26-LO.**

|                                              |            |
|----------------------------------------------|------------|
| M199/F12 (HAM) 1:1 (Gibco®)                  | 500ml      |
| HEPES (Gibco®) 1 M                           | 15 mM      |
| L-glutamine (Gibco®) 200mM                   | 2 mM       |
| hEGF (Invitrogen) 1 mg/ml                    | 20 ng/ml   |
| Hydrocortisone 1 mg/ml                       | 40 ng/ml   |
| Transferrin (Sigma) 2.5 mg/ml                | 5 ug/ml    |
| Insulin (ActRapid) 100 IU/ml                 | 0.2IU/ml   |
| Glucose (Sigma) 10%                          | 0.06%      |
| FCS (HyClone)                                | 7.5%       |
| Tri-iodothyronine (Sigma) 0.1 mg/ml          | 0.5 pg/ml  |
| MEM vitamins (Gibco®) (100x)                 | 5 ml       |
| O-phosphoryl ethanolamine (Sigma) (20 mg/ml) | 2 ug/ml    |
| Penicillin Streptomycin (Gibco®)             | 5 ml       |
| Gentamicin (Pfizer) (40 mg/ml)               | 0.02 mg/ml |

### **3. Culture Medium for TKCC-05, 06 (HPAC Modified Medium).**

|                         |       |
|-------------------------|-------|
| DMEM/F12 (HAM) (Gibco®) | 500ml |
|-------------------------|-------|

|                                         |           |
|-----------------------------------------|-----------|
| HEPES (Gibco®)                          | 15 mM     |
| Transferrin (Sigma) 2.5 mg/ml           | 5 ug/ml   |
| FCS (HyClone)                           | 7%        |
| Insulin (ActRapid) (100 IU/ml)          | 0.1 IU/ml |
| hEGF (Invitrogen) 1 mg/ml               | 10 ng/ml  |
| Hydrocortisone 1 mg/ml                  | 40 ng/ml  |
| Glucose Sigma (10%)                     | 0.12%     |
| Penicillin Streptomycin (Gibco®)        | 5 ml      |
| Gentamicin (Pfizer) (40 mg/ml)<br>mg/ml | 0.02      |

#### 4. Culture Medium for TKCC-18-LO, 19-LO (IMDM Modified Medium).

|                                  |            |
|----------------------------------|------------|
| IMDM (Gibco®)                    |            |
| FCS (HyClone)                    | 20%        |
| hEGF (Invitrogen) 1 mg/ml        | 20 ng/ml   |
| Transferrin (Sigma) 2.5 mg/ml    | 2.5 ug/ml  |
| Insulin (ActRapid) 100 IU/ml     | 0.2IU/ml   |
| MEM vitamins (Gibco®) (100x)     | 2.5 ml     |
| Penicillin Streptomycin (Gibco®) | 5 ml       |
| Gentamicin (Pfizer) (40 mg/ml)   | 0.02 mg/ml |

#### 5. Primers used for mtDNA sequencing

##### Amplicon 1

|         |                                |
|---------|--------------------------------|
| Amp1-F  | 5'-GGCTTTCTCAACTTTTAAAGGATA-3' |
| 12899-R | 5'-CATGCTAAGGCGAGGATGAA-3'     |
| 12834-F | 5'-AGCAGCCATTCAAGCAATCC-3'     |
| 13306-F | 5'-CTAGCATTCTGCACATCTG-3'      |
| 13588-F | 5'-CTGACAAGCGCCTATAGCAC-3'     |
| 14447-R | 5'-AGGAGTATCCTGAGGCATGG-3'     |
| 14371-F | 5'-TCCTACCTCCATCGCTAACC-3'     |
| 15087-F | 5'-ACATCGGCATTATCCTCCTG-3'     |
| 15759-F | 5'-TCGGAGGACAACCAGTAAGC-3'     |
| 16492-F | 5'-ATCCGACATCTGGTTCCTAC-3'     |
| 42-R    | 5'-AGAGCTCCCGTGAGTGGTTA-3'     |
| 891-R   | 5'-GGCACGAAATTGACCAACC-3'      |
| 751-F   | 5'-ACAAGCATCAAGCACGCAGC-3'     |
| 1721-R  | 5'-GGCTAAGGTTGTCTGGTAGT-3'     |
| 1551-F  | 5'-GGAGACAAGTCGTAACATGG-3'     |
| 2324-F  | 5'-TTCTCCTCCGCATAAGCCTG-3'     |

## Amplicon 2

2909-F 5'-GACCAACGGAACAAGTTACC-3'  
3106-R 5'-GTAGATAGAAACCGACCTGG-3'  
3322-F 5'CTCCTACTCCTCATTGTACC-3'  
3340-R 5'-GTACAATGAGGAGTAGGAGG-3'  
3559-R 5'-GTAGAAGAGCGATGGTGAGA-3'  
4162-R 5'-TGAGTTGGTCGTAGCGGAAT-3'  
4040-F 5'-CAACATATGACGCACTCTCC-3'  
4344-F 5'-TCGAACCCATCCCTGAGAAT-3'  
4838-F 5'-TCTGACATCCGGCCTGCTTC-3'  
5603-F 5'-CCACTCTGCATCAACTGAAC-3'  
5911-F 5'-CCGACCGTTGACTATTCTCT-3'  
5995-R 5'-GTGCCTAGGACTCCAGCTCA-3'  
6325-F 5'-CCTCCGTAGACCTAACCATC-3'  
6413-R 5'ATTGATAATTGTTGTGATGA-3'  
6946-F 5'-TCACCGTAGGTGGCCTGACT-3'  
7400-F 5'-CCCACCCTACCACACATTTCG-3'  
7743-F 5'-CTAACATCTCAGACGCTCAG-3'  
8254-F 5'-CGTATTTACCCTATAGCACC-3'  
8782-R 5'-CGAGGAGGTTAGTTGTGGCA-3'  
8642-F 5'-ACAACCGACTAATCACCACC-3'  
9001-F 5'-CGCCTAACCGCTAACATTAC-3'  
9378-F 5'-TGGCGCGATGTAACACGAGA-3'  
10380-R 5'-GTAGTCACTCATAGGCCAGA-3'  
10131-F 5'-CCACAACCTAACGGCTACAT-3'  
10534-F 5'-ATCGCTCACACCTCATATCC-3'  
10961-F 5'-CTAACTACCTGACTCCTACC-3'  
11680-F 5'-AAGCTTCACCGGCGCAGTCA-3'

# Supplementary Figure 1 - Hardie et al

bp 438 L strand promoter

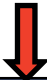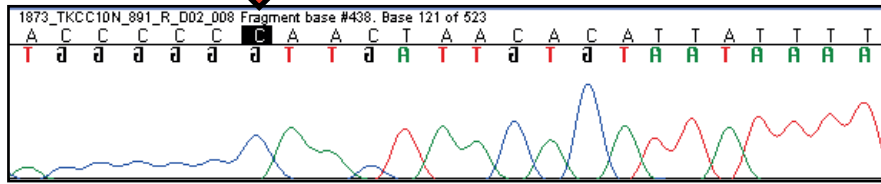

normal

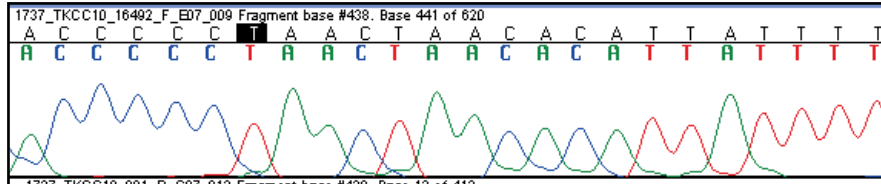

PDCL

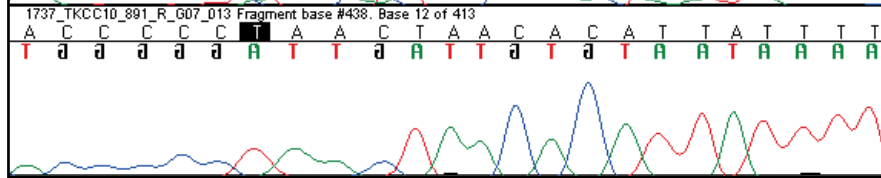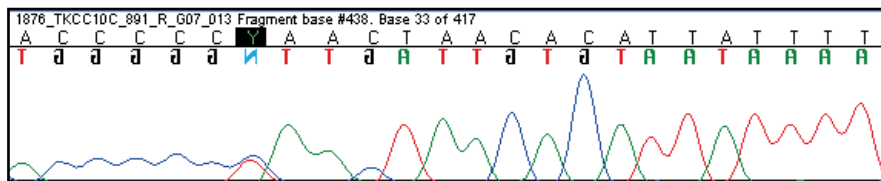

primary tumour

**Supplementary Table 2:** Detailed description of function in nuclear mitochondrial and metabolic genes with non-synonymous mutations in PDCLs.

| <b>Gene mutated</b> | <b>Name and function of protein encoded</b>                                                                                                                                                                                                                                                                                                                       | <b>Cell line</b>                     |
|---------------------|-------------------------------------------------------------------------------------------------------------------------------------------------------------------------------------------------------------------------------------------------------------------------------------------------------------------------------------------------------------------|--------------------------------------|
| <b>TRIT1</b>        | tRNA isopentenyl transferase, lung cancer tumour suppressor (Spinola et al. 2005).                                                                                                                                                                                                                                                                                | TKCC-02                              |
| <b>TP53</b>         | Tumour protein 53, regulates cell cycle and acts as tumour suppressor (Cho et al. 1994).                                                                                                                                                                                                                                                                          | TKCC-04, TKCC-17-LO (different site) |
| <b>ACACA</b>        | Acetyl Co-A carboxylase, involved in rate limiting step of fatty acid synthesis.                                                                                                                                                                                                                                                                                  | TKCC-04                              |
| <b>CPT1C</b>        | Carnitine palmitoyltransferase I, an acetyltransferase involved in transport of long chain fatty acids across outer mitochondrial membrane by binding them to carnitine. Important in fatty acid metabolism.                                                                                                                                                      | TKCC-04                              |
| <b>PIK3CA</b>       | Phosphatidylinositol 3-kinase, signalling important in many cancers, eg. Mutation associated with improved colorectal cancer survival with adjuvant aspirin therapy (Liao et al. 2012).                                                                                                                                                                           | TKCC-04                              |
| <b>PDHA2</b>        | Pyruvate dehydrogenase (lipoamide) alpha 2, a testis-specific mitochondrial matrix enzyme that catalyses the oxidative decarboxylation of pyruvate, producing acetyl-CoA and CO <sub>2</sub> . Key enzyme in controlling the balance between lipid and glucose oxidation depending on substrate availability.                                                     | TKCC-04                              |
| <b>AKT3</b>         | RAC-gamma serine/threonine-protein kinase, enzyme, AKT kinases are regulators of cell signalling in response to insulin and growth factors. This kinase has been shown to be stimulated by platelet-derived growth factor (PDGF), insulin, and insulin-like growth factor 1 (IGF1).                                                                               | TKCC-09                              |
| <b>YME1L1</b>       | ATP-dependent metalloprotease YME1L1, gene proposed to plays a role in mitochondrial protein metabolism and could be involved in mitochondrial pathologies (Coppola et al. 2000).                                                                                                                                                                                 | TKCC-09                              |
| <b>ADCK4</b>        | aaRF domain containing kinase 4, This gene encodes a protein with two copies of a domain found in protein kinases. The encoded protein has a complete protein kinase catalytic domain, and a truncated domain that contains only the active and binding sites of the protein kinase domain, however, it is not known whether the protein has any kinase activity. | TKCC-09, TKCC-16-LO (different site) |
| <b>MTCP1</b>        | Protein p13 MTCP-1, oncoprotein (Yang et al. 1998).                                                                                                                                                                                                                                                                                                               | TKCC-15-LO                           |
| <b>HMGCL</b>        | 3-Hydroxymethyl-3-Methylglutaryl-CoA Lyase, mitochondrial enzyme that catalyzes the final step of leucine degradation and plays a key role in ketone body formation. Mutations in this gene are associated with HMG-CoA lyase deficiency.                                                                                                                         | TKCC-16-LO                           |
| <b>TARS2</b>        | Threonyl-TRNA Synthetase 2, Mitochondrial (Putative), mitochondrial aminoacyl-tRNA synthetase.                                                                                                                                                                                                                                                                    | TKCC-18-LO                           |
| <b>LDHB</b>         | Lactate dehydrogenase B, enzyme which catalyzes the reversible conversion of lactate and pyruvate, and NAD and NADH, in the glycolytic pathway. Mutations in this gene are associated with lactate dehydrogenase B deficiency. Implicated in cancers (McClelland et al. 2012; Brown et al. 2013)                                                                  | TKCC-26-LO                           |
